# Supplementary material for: Procedure-Related Differences and Clinical Outcomes in Patients Treated with Percutaneous Coronary Intervention Assisted by Optical Coherence Tomography between New and Earlier Generation Software (Ultreon™ 1.0 Software vs. AptiVue™ Software)
Source: MDPI journal article supplement (doi:10.3390/jcdd9070218), 2022-07-06
Supplement: s1 [file s1]

**Table S1.** Biochemical indices.

|                                  | <b>Total<br/>N = 95</b>             | <b>Ulteron™ 1.0<br/>software<br/>N = 55</b> | <b>Earlier generation<br/>software<br/>N = 40</b> | <b>P-value</b> |
|----------------------------------|-------------------------------------|---------------------------------------------|---------------------------------------------------|----------------|
| Creatinine before PCI            | 91 ± 23.9<br>88.5 (73.5; 104.2)     | 93.2 ± 24.3<br>90 (75.7; 106.5)             | 87.8 ± 23.3<br>82.6 (71.9; 100.6)                 | 0.24           |
| Creatinine after PCI             | 95.8 ± 29.5<br>89 (74; 111)         | 94.2 ± 24.4<br>89.2 (77; 109.2)             | 98.1 ± 35.7<br>87.5 (71.3; 123)                   | 0.56           |
| GFR, mL/min.                     | 78.6 ± 26.8<br>76 (63; 85)          | 76 ± 28.9<br>73 (58; 83)                    | 82.1 ± 23.4<br>78 (66; 96.5)                      | 0.27           |
| PLT, *10 <sup>3</sup> /μL        | 248.2 ± 78.8<br>234 (191; 290)      | 251.7 ± 81.6<br>240 (180; 318)              | 243.3 ± 75.4<br>232.5 (196.5; 260.7)              | 0.66           |
| Haemoglobin before PCI,<br>mg/dL | 13.7 ± 1.8<br>13.6 (13; 14.7)       | 13.6 ± 1.7<br>13.5 (12.9; 14.5)             | 13.9 ± 1.9<br>13.7 (13; 15)                       | 0.32           |
| Haemoglobin after PCI,<br>mg/dL  | 12.5 ± 2.7<br>12.8 (10.9; 13.9)     | 12.6 ± 2.2<br>12.8 (10.9; 14.1)             | 12.2 ± 3.3<br>12.8 (10.9; 13.4)                   | 0.95           |
| RBC, *10 <sup>6</sup> /μL        | 4.5 ± 0.5                           | 4.4 ± 0.5                                   | 4.6 ± 0.6                                         | 0.07           |
| CRP, mg/dL                       | 17.1 ± 33.8<br>10.6 (2.4; 19.7)     | 14.7 ± 11<br>11.3 (5.3; 23.8)               | 21.1 ± 53.9<br>2.5 (1.2; 17)                      | 0.09           |
| Total cholesterol, mmol/L        | 4 ± 1.4<br>3.7 (3; 4.7)             | 4.1 ± 1.4<br>3.8 (3.2; 4.8)                 | 3.9 ± 1.3<br>3.6 (2.8; 4.8)                       | 0.45           |
| LDL cholesterol, mmol/L          | 2.1 ± 1.2<br>1.80 (1.38; 2.70)      | 2.2 ± 1.2<br>1.90 (1.40; 2.70)              | 2.1 ± 1.2<br>1.80 (1.10; 2.85)                    | 0.6            |
| TGL, mmol/L                      | 1.5 ± 0.7<br>1.4 (1; 1.8)           | 1.5 ± 0.6<br>1.4 (1; 1.8)                   | 1.6 ± 0.9<br>1.3 (1; 1.9)                         | 0.81           |
| HDL cholesterol, mmol/L          | 1.2 ± 0.4<br>1.1 (0.9; 1.3)         | 1.2 ± 0.4<br>1.1 (0.9; 1.3)                 | 1.1 ± 0.3<br>1 (0.9; 1.3)                         | 0.79           |
| Maximal CK-Mb, IU/L              | 60.9 ± 81.7<br>24 (16; 74.7)        | 50.8 ± 78.8<br>22.5 (15.7; 46.3)            | 74.7 ± 85.4<br>26 (18.2; 112)                     | 0.23           |
| Maximal troponin T,<br>pg/mL     | 2943.6 ± 7341.8<br>329 (65.1; 1307) | 1084.3 ± 1517.2<br>426 (121; 1305)          | 5303.5 ± 10571.2<br>284 (24.46; 4534)             | 0.58           |
| NT-pro BNP, pg/mL                | 2807.5 ± 3926.7<br>1592 (805; 3013) | 2897.3 ± 4439.9<br>1899 (504; 3017)         | 2578 ± 2335.9<br>1511 (1136.5; 4158)              | 0.6            |
| Glucose, mmol/L                  | 6.9 ± 2.1<br>6.1 (5.3; 8.1)         | 7.2 ± 2.2<br>6.2 (5.3; 8.5)                 | 6.3 ± 1.8<br>5.8 (5.3; 6.5)                       | 0.31           |

Data are expressed as mean ± standard deviation and median ± interquartile range where necessary (non-normal distribution) or numbers (percentages). BNP, B-type natriuretic peptide; CK-Mb, creatine kinase myocardial bound; CRP, C-reactive protein; GFR, glomerular filtration rate;

HDL, high-density lipoproteins; LDL, low-density lipoproteins; NT, N-terminal; PCI, percutaneous coronary intervention; PLT, platelet count; RBC, red blood cells; TGL, triglycerides.

**Table S2.** Pharmacotherapy.

|                                                                            | <b>Total<br/>N = 95</b> | <b>Ulteron™ 1.0<br/>Software<br/>N = 55</b> | <b>Earlier generation<br/>software<br/>N = 40</b> | <b>P-value</b> |
|----------------------------------------------------------------------------|-------------------------|---------------------------------------------|---------------------------------------------------|----------------|
| Acetyl-salicylic acid                                                      | 91 (95.8)               | 52 (94.5)                                   | 39 (97.5)                                         | 0.46           |
| P <sub>2</sub> Y <sub>12</sub> inhibitor:                                  |                         |                                             |                                                   |                |
| - clopidogrel                                                              | 50 (52.6)               | 29 (52.7)                                   | 21 (52.5)                                         | 0.98           |
| - prasugrel                                                                | 10 (10.5)               | 6 (10.9)                                    | 4 (10)                                            | 0.88           |
| - ticagrelor                                                               | 33 (34.7)               | 19 (34.5)                                   | 14 (35)                                           | 0.96           |
| Antithrombotic treatment<br>(heparins, old and new oral<br>anticoagulants) | 16 (16.8)               | 9 (16.4)                                    | 7 (17.5)                                          | 0.88           |
| Lipid-lowering treatment                                                   |                         |                                             |                                                   |                |
| - statin                                                                   | 89 (93.7)               | 51 (92.7)                                   | 38 (95)                                           | 0.64           |
| - fibrate                                                                  | 3 (3.16)                | 1 (1.82)                                    | 2 (5)                                             | 0.38           |
| - ezetimibe                                                                | 10 (10.5)               | 8 (14.5)                                    | 2 (5)                                             | 0.11           |
| Insulinothrapy                                                             | 14 (14.7)               | 9 (16.4)                                    | 5 (12.5)                                          | 0.59           |
| Oral anti-diabetic therapy                                                 | 22 (23.2)               | 16 (29.1)                                   | 6 (15)                                            | 0.1            |
| Angiotensin converting<br>enzyme inhibitors                                | 80 (84.2)               | 45 (81.8)                                   | 35 (87.5)                                         | 0.44           |
| Calcium channel blockers                                                   | 25 (26.3)               | 13 (23.6)                                   | 12 (30)                                           | 0.48           |
| Beta blocker                                                               | 85 (89.5)               | 49 (89.1)                                   | 36 (90)                                           | 0.89           |
| Inhalators<br>(bronchodilators/GCSs)                                       | 10 (10.5)               | 4 (7.3)                                     | 6 (15)                                            | 0.23           |

Data are expressed as mean ± standard deviation and median ± interquartile range where necessary (non-normal distribution) or numbers (percentages). GCSs, glicocorticosteroids.

**Table S3.** Predictors of stent expansion – univariable analysis.

| Variable                                                | Estimate | 95% Confidence Interval | P-value |
|---------------------------------------------------------|----------|-------------------------|---------|
| Ultreon 1.0 vs. older software                          | 0.407    | (-3.182)–3.998          | 0.82    |
| COPD/bronchial asthma, no vs. yes                       | 6.367    | 2.103–10.631            | 0.004   |
| Minimal stent diameter, mm                              | 5.091    | 0.968–9.214             | 0.016   |
| Inhalators (GKSs/bronchodilators) , no vs. yes          | 6.795    | 1.638–11.952            | 0.01    |
| Age, years                                              | -0.313   | (-0.591)–(-0.035)       | 0.03    |
| Euroscore II, %                                         | -1.409   | (-2.787)–(-0.032)       | 0.045   |
| STS score, %                                            | -2.044   | (-4.007)–(-0.082)       | 0.041   |
| SYNTAX score II, 4 years survival for CABG              | -0.41    | (-0.749)–(-0.071)       | 0.018   |
| Haemoglobin, mg/dL                                      | 2.558    | 0.716–4.399             | 0.007   |
| Diabetes mellitus, no vs. yes                           | -2.599   | -6.126–0.927            | 0.15    |
| Dialysotherapy, no vs. yes                              | 12.595   | -3.956–29.148           | 0.13    |
| Prior PCI, no vs. yes                                   | 2.51     | -0.902–5.924            | 0.14    |
| History of CVD, no vs. yes                              | 4.482    | -0.781–9.745            | 0.09    |
| Prior peripheral percutaneous interventions, no vs. yes | 6.846    | -2.829–16.521           | 0.16    |
| Sirolimus eluting stent, no vs. yes                     | 3.413    | -1.101–7.927            | 0.14    |
| Total length of stents, mm                              | 0.112    | -0.013–0.237            | 0.078   |
| Maximal stent diameter, mm                              | -0.786   | -1.863–0.29             | 0.15    |
| Treatment with ezetimibe, no vs. yes                    | -4.095   | -9.173–0.981            | 0.11    |
| Insulinotherapy, no vs. yes                             | -4.556   | -9.15–0.038             | 0.05    |
| Creatinine, $\mu\text{mol/L}$                           | -0.114   | -0.249–0.02             | 0.09    |
| Platelets count, $\times 10^3/\mu\text{L}$              | -0.036   | -0.075–0.002            | 0.06    |
| Red cells count, $\times 10^6/\mu\text{L}$              | 5.14     | -0.823–11.103           | 0.09    |
| Total cholesterol, mmol/L                               | 1.806    | -0.956–4.569            | 0.19    |
| LDL chol, mmol/L                                        | 2.184    | -0.978–5.346            | 0.17    |
| TGL, mmol/L                                             | 5.364    | -0.506–11.235           | 0.07    |
| NT-pro BNP, pg/mL                                       | -0.001   | -0.002–0.0001           | 0.07    |
| Summary stent's length, mm                              | 0.112    | -0.013–0.237            | 0.07    |
| Maximal stent diameter, mm                              | -0.786   | -1.863–0.29             | 0.15    |

CABG, coronary artery bypass grafting; COPD, chronic obstructive pulmonary disease; CVD, cardiovascular disease; GKS, glucocorticosteroids; LDL, low-density lipoproteins; NT-proBNP, N-terminal-pro-B-type natriuretic peptide; TGL, triglycerides; STS, Society of Thoracic Surgeons.
